# Supplementary material
Source: publisher site journal article supplement (https://www.spandidos-publications.com/7577/downloadSupplementary)
Supplement: Supplementary file 1 [file downloadSupplementary]

## Sheet: test cohort (GSE57065)
Gene	GSM1373914	GSM1373915	GSM1373916	GSM1373917	GSM1373918	GSM1373919	GSM1373920	GSM1373921	GSM1373922	GSM1373923	GSM1373924	GSM1373925	GSM1373926	GSM1373927	GSM1373928	GSM1373929	GSM1373930	GSM1373931	GSM1373932	GSM1373933	GSM1373934	GSM1373935	GSM1373936	GSM1373937	GSM1373938	GSM1373939	GSM1373940	GSM1373941	GSM1373942	GSM1373943	GSM1373944	GSM1373945	GSM1373946	GSM1373947	GSM1373948	GSM1373949	GSM1373950	GSM1373951	GSM1373952	GSM1373953	GSM1373954	GSM1373955	GSM1373956	GSM1373957	GSM1373958	GSM1373959	GSM1373960	GSM1373961	GSM1373962
Ataxia telangiectasia mutated	5.16106	5.37156	5.24766	5.96871	5.82151	5.65637	5.66514	5.86982	5.67406	5.3336	5.56517	5.55166	5.50736	5.65704	5.41406	5.17443	5.3505	5.51764	5.91163	5.44901	5.96718	5.68283	5.81771	5.6565	5.41561	5.39828	5.62282	5.74381	5.4728	5.75328	5.59848	5.35342	5.3442	5.97726	5.94761	5.83174	5.75087	5.35768	5.27208	5.71423	5.47792	5.61185	5.59068	6.03351	5.92044	5.39668	5.6718	5.62608	5.25663
Thioredoxin	7.94179	8.52694	8.30626	7.38392	7.65013	7.44062	8.65974	8.11209	7.70454	7.63656	7.405	7.44512	7.757	7.41787	7.24873	7.97676	7.28096	7.18305	7.36659	6.74408	7.32648	7.38854	7.56578	7.00348	7.73203	7.18227	7.15477	7.06923	8.11844	7.86177	7.25394	7.45989	6.85216	7.13594	6.90991	7.32845	7.25112	7.16061	6.83873	7.37648	7.64182	7.38856	7.55265	7.83064	7.13103	7.38979	7.3452	7.36163	7.4555
Dipeptidyl peptidase 4	3.2171	2.90814	4.0093	4.58352	4.26257	4.08953	3.05099	3.19712	3.17211	3.50707	3.21086	3.82651	3.53784	2.98889	3.33135	2.79102	3.13813	3.63825	3.89422	3.23545	3.78616	3.24643	3.54714	3.20927	3.47259	3.31254	3.1889	3.90074	2.84436	3.38454	3.80685	3.5259	3.2416	4.3964	4.11712	4.43613	3.61133	3.40232	3.30555	3.47719	3.28047	3.25941	3.13198	3.52741	3.92304	3.24004	3.51465	3.70906	3.73329
[truncated: 58 more columns]

## Sheet: validation cohort A (GSE131761)
Gene	GSM3816544	GSM3816545	GSM3816547	GSM3816548	GSM3816550	GSM3816551	GSM3816554	GSM3816555	GSM3816556	GSM3816557	GSM3816560	GSM3816561	GSM3816562	GSM3816563	GSM3816565	GSM3816566	GSM3816567	GSM3816568	GSM3816569	GSM3816570	GSM3816571	GSM3816572	GSM3816573	GSM3816574	GSM3816575	GSM3816576	GSM3816577	GSM3816579	GSM3816580	GSM3816581	GSM3816582	GSM3816585	GSM3816586	GSM3816587	GSM3816589	GSM3816590	GSM3816592	GSM3816593	GSM3816594	GSM3816596	GSM3816597	GSM3816598	GSM3816599	GSM3816600	GSM3816601	GSM3816602	GSM3816603	GSM3816605	GSM3816606
Ataxia telangiectasia mutated	7.79986	8.07885	7.60568	8.00218	7.876	7.7982	7.65324	8.16491	7.7166	7.69148	7.82391	8.21901	7.87628	8.4875	7.76597	7.68006	8.66902	8.12264	7.80306	7.6244	8.89137	8.30589	7.73358	8.1331	7.44363	7.87668	8.23782	7.70112	7.76465	8.17774	7.80333	7.80085	7.99421	7.5411	8.34126	8.10137	7.79273	7.94656	7.90762	8.11372	8.56923	8.01332	8.22725	8.24819	7.77802	8.27015	8.08767	7.972	8.45227
Thioredoxin	14.2039	13.8729	14.2104	13.9135	14.0708	13.9647	13.3949	14.3871	14.2397	14.3754	14.9689	12.9801	14.9051	14.226	14.5688	14.1088	14.5799	13.3661	14.1359	13.6761	13.4326	13.4552	13.2383	13.5255	13.8057	13.7413	14.6253	14.5799	14.6145	13.2688	14.6595	13.9114	13.5303	14.3368	14.6037	14.6457	13.8707	13.6705	14.2746	14.7641	14.4507	13.5172	14.6279	14.1271	13.9538	14.1577	14.1225	15.0098	12.6944
Dipeptidyl peptidase 4	7.46911	7.76091	7.60017	8.28554	7.56213	7.08811	7.03381	7.46177	7.52481	7.54026	7.15209	8.97286	7.13378	7.5766	7.55604	7.57168	7.24334	7.83944	7.46045	7.31587	8.39722	8.03742	7.82134	7.64455	7.49053	8.36815	7.38086	7.24913	7.31627	8.6168	7.10881	6.93616	8.39369	7.26426	7.66478	7.46602	7.09261	8.02899	7.40885	7.7542	7.41072	7.36738	7.59834	7.01944	8.11803	7.97081	7.6332	7.5407	7.9366
[truncated: 47 more columns]

## Sheet: validation cohort B (GSE95233)
Table SIX. Transcriptomic Profiles of hub-FRDEGs in the test cohort (GSE57065), validation cohort A (GSE131761), and validation cohort B (GSE95233).
Gene	GSM2500349	GSM2500350	GSM2500351	GSM2500352	GSM2500353	GSM2500354	GSM2500355	GSM2500356	GSM2500357	GSM2500358	GSM2500359	GSM2500360	GSM2500361	GSM2500362	GSM2500363	GSM2500364	GSM2500365	GSM2500366	GSM2500367	GSM2500368	GSM2500369	GSM2500370	GSM2500371	GSM2500372	GSM2500373	GSM2500374	GSM2500375	GSM2500376	GSM2500377	GSM2500378	GSM2500379	GSM2500380	GSM2500381	GSM2500382	GSM2500383	GSM2500384	GSM2500385	GSM2500386	GSM2500387	GSM2500388	GSM2500389	GSM2500390	GSM2500391	GSM2500392	GSM2500393	GSM2500394	GSM2500395	GSM2500396	GSM2500397
Ataxia telangiectasia mutated	7.00861	6.95411	7.42093	6.73638	6.67305	7.10454	6.64096	6.98241	6.86964	6.48163	6.68298	6.74875	7.18937	6.87774	6.80813	6.65134	6.59351	6.74548	6.74036	7.07323	6.3404	6.88884	6.28124	6.14481	5.97654	5.8081	5.98713	5.7977	5.71832	6.06457	5.6061	6.37624	5.95303	6.14132	5.90443	6.28805	5.85638	6.11813	5.87396	6.01357	6.02746	6.01014	5.10455	6.63262	6.29113	6.50292	5.95206	6.14677	5.76359
Thioredoxin	8.46478	8.56566	7.22095	8.56053	8.62522	7.91775	7.92317	8.31204	8.67533	7.51121	8.33386	8.17886	8.29778	9.07835	8.34004	9.06789	8.25149	8.04573	8.25256	7.72376	7.83068	7.8788	10.3716	10.3284	10.9583	10.9911	10.852	10.6323	9.48971	10.5642	10.3323	9.8827	10.6793	10.1188	10.6222	10.1826	10.0671	9.99948	10.5341	9.50265	10.3402	10.3468	9.83798	9.81502	10.5229	10.4046	10.3301	10.3116	10.9303
Dipeptidyl peptidase 4	5.76143	6.31744	7.07395	6.49938	6.04149	7.04868	6.13258	6.00223	6.21804	6.22828	6.47471	6.57572	5.95629	6.27069	6.7488	6.07035	6.38351	5.8101	6.3353	6.81043	5.91938	6.62597	5.02044	4.5141	4.32929	4.65457	4.81312	4.4698	5.54346	5.30081	3.85261	5.49573	3.39423	4.51081	4.486	5.1475	4.61914	5.90715	4.75224	4.68379	4.49981	4.95213	3.98699	6.32058	4.46052	4.63792	3.75449	4.52885	4.88266
[truncated: 75 more columns]
